# Supplementary figures and images for: Inverse 3D ‘lab-on-a-chip’ polymeric microfilms for selective capture of circulating tumor cells from patients' blood
Source: Royal Society of Chemistry journal article supplement (doi:10.1039/d4lc01105h), 2025-01-01

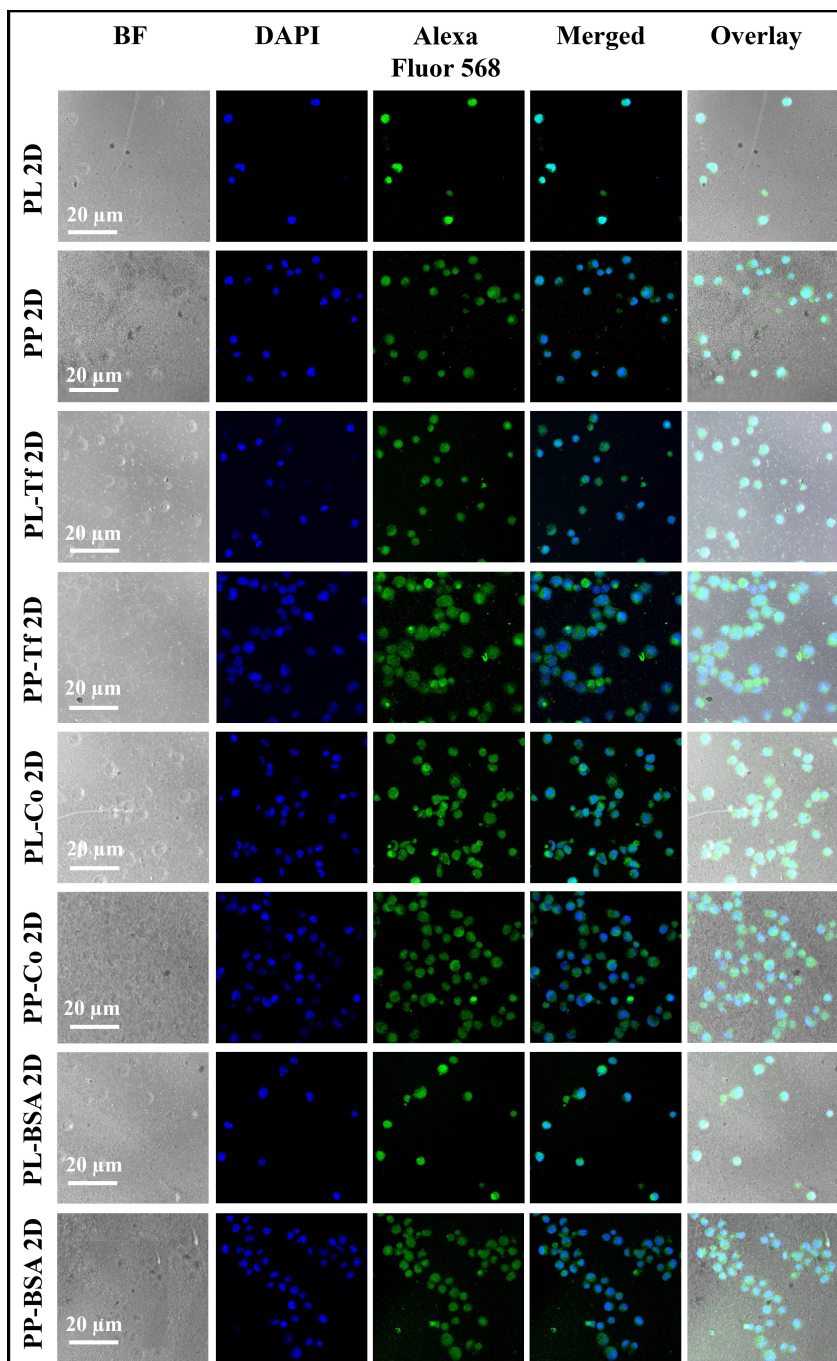

Supplement: d4lc01105h2.pdf [file d4lc01105h2.pdf]

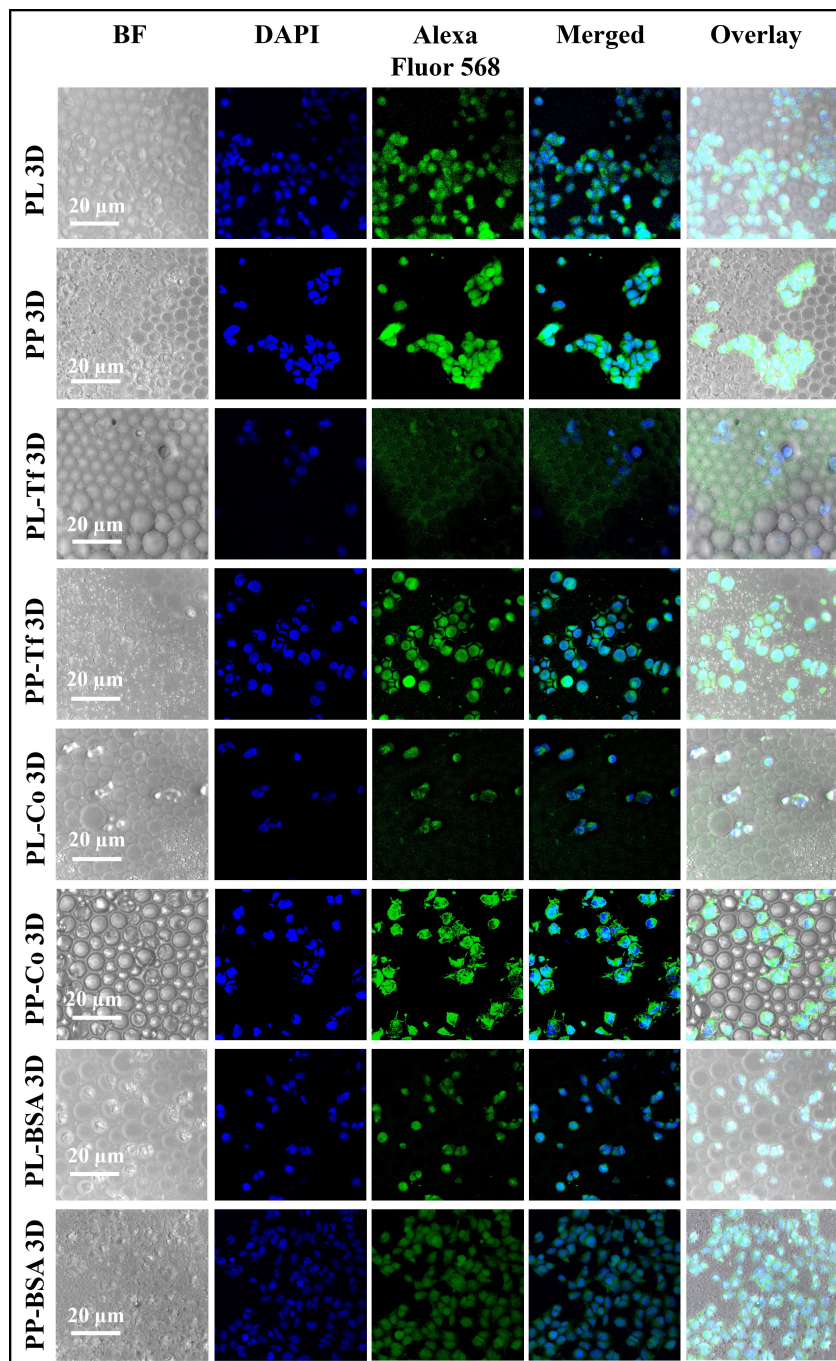

Supplement: d4lc01105h3.pdf [file d4lc01105h3.pdf]
